# Supplementary material for: Mapping synaptic glutamate transporter dysfunction in vivo to regions surrounding Aβ plaques by iGluSnFR two-photon imaging
Source: PubMed Central journal article supplement (PMC5114608; doi:10.1038/ncomms13441), 2016-11-11
Supplement: ncomms13441-s1.pdf [file ncomms13441-s1.pdf]

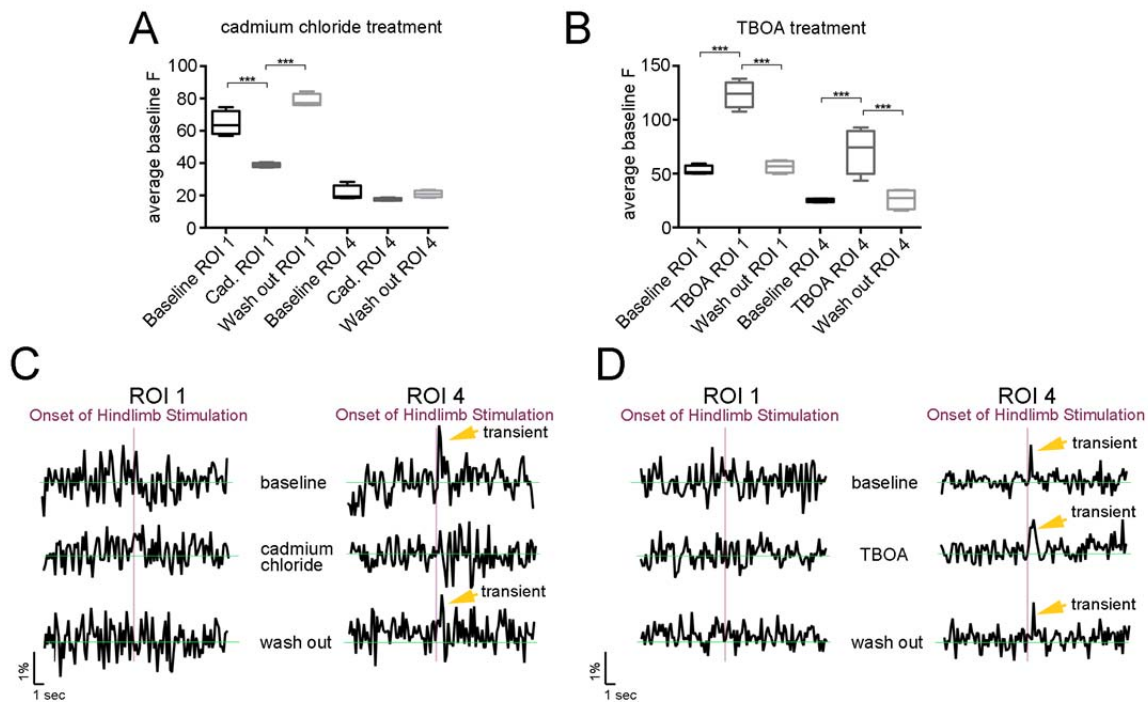

**Supplementary Fig.1 Measurement of iGluSnFR signal fluorescence in plaque microenvironment and manipulation of glutamate signaling pathway**

Intracortical injection of AAV.hSynapsin.iGluSnFR in somatosensory cortex area (APPPS1 n=7-9, 3-7 imaged brain areas/mouse). A) Fluorescence of iGluSnFR to calculate relative glutamate levels was measured in ROI1 and ROI4 by averaging baseline frames 1-25 over all APPPS1 animals. ROI1 shows a significantly higher level of fluorescence in comparison to ROI4 pointing towards higher glutamate levels within this area. B-E) Open brain experiments after intracortical injection of AAV.hSynapsin.iGluSnFR in somatosensory cortex area (APPPS1 n=2, 2 imaged brain areas/mouse) were used to manipulate the glutamate pathway. B) Cadmium chloride ( $\text{Cd}^{2+}$ , 1mM) was applied topically to the brain (dura mater was left intact) to block all presynaptic transmitter release and thus release of glutamate. The detected levels of glutamate fluorescence changed upon treatment. Levels in ROI1 were significantly reduced however stayed elevated in comparison to ROI4 levels. C) Treatment with TBOA was used to block glutamate uptake. In this experiment fluorescent levels of ROI1 and ROI4 were significantly increased, with ROI1 displaying permanently higher levels throughout the baseline, treatment and wash-out phase. Both treatments could be reversed after a wash-out phase of 10 min. D-E) Confirmation of the change in glutamate signaling can be seen in the average traces of all recorded animals. Upon application of  $\text{Cd}^{2+}$  the sensory evoked response is abolished and returns after a 10 min wash-out phase (panel D). Upon treatment with TBOA the hindlimb response is longer and wider resulting in a longer rate of decay which also reversed to its baseline level after a 10 min wash-out phase. \*\*\* $P < 0.001$ , \*\* $P < 0.01$ , \* $P < 0.05$ .

1  
2  
3  
4  
5  
6  
7  
8  
9  
10  
11  
12  
13  
14  
15  
16  
17  
18  
19  
20  
21  
22  
23  
24  
25

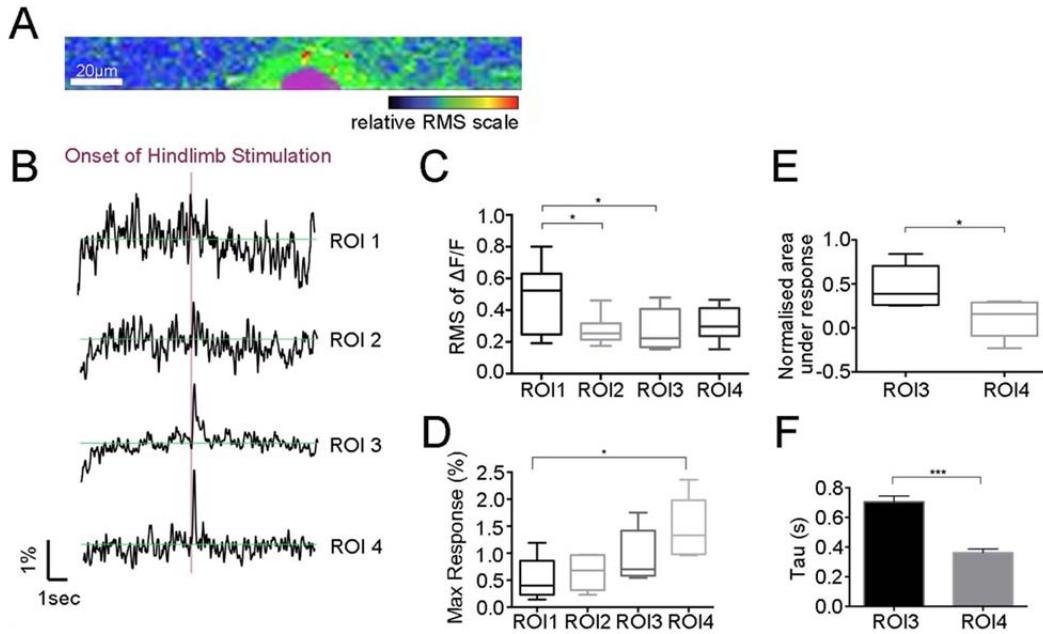

26  
27

28 **Supplementary Fig.2 Detection of altered glutamate dynamics in Aβ plaque**  
29 **microenvironment using tplsms linescan imaging**  
30

31 A) Intracortical injection of AAV.hSynapsin.iGluSnFR in somatosensory cortex area (APPPS1  
32 mice n=9, 3-4 imaged brain areas/mouse). Glutamate fluctuations were imaged using linescan  
33 tplsms (16x128 Pixels, 57Hz). Relative overall fluctuation of glutamate is shown in false colour  
34 RMS map. Methoxy\_X04 stained amyloid deposit is coloured in purple. APPPS1 animals show  
35 altered glutamatergic activity near plaque. Scalebar 20µm B) Traces representing glutamate  
36 dynamics differ significantly in relation to Aβ plaque distance. High fluctuations were measured  
37 in ROI1 in which no stimulus locked response was detected. ROI3 displayed a stimulus-evoked  
38 response with significantly altered characteristics in comparison to ROI4. C) The highest average  
39 RMS was measured in the direct vicinity of Aβ plaques with its average RMS of ΔF/F being  
40 significantly different in comparison to all other ROIs. D) The maximal response to the  
41 stimulation was detected in the ROI imaged farthest away from the Aβ plaque (ROI4). E) A  
42 significant difference in the area under the response between ROI3 and ROI4 was detected. F)  
43 The decay rates of glutamate calculated for ROIs3 and 4 are significantly different. Error bars  
44 indicate SEM. \*\*\*P<0.001, \*\*P<0.01, \*P<0.05.

45

46

47

48

**A** recordings with increased number of trials

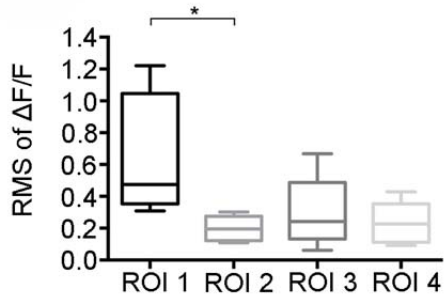

**B** mean of all glutamate recordings with increased trial number

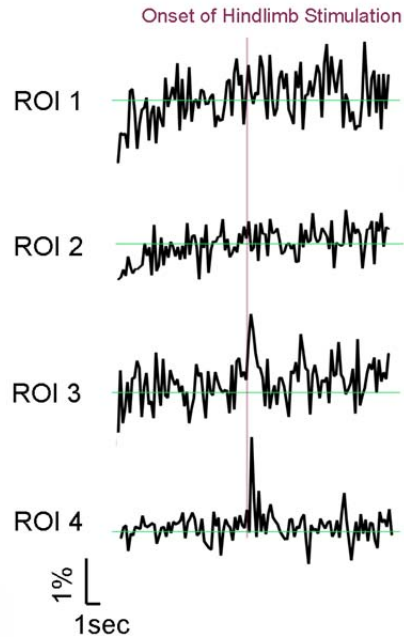

49

### 50 **Supplementary Fig.3 Reduction of possible background noise in ROI1**

51 A) To exclude the possibility that a stimulus evoked response of glutamate is hidden in the high  
52 fluctuation in ROI1, the hindlimb stimulation was repeated using 100 trials. RMS of average  
53 RMS of  $\Delta F/F$  was still significantly higher in ROI1 in comparison to all other ROIS and the  
54 mean of all measured glutamate traces did still not result in a stimulus locked response in ROI1  
55 and 2 B). \*\*\* $P < 0.001$ , \*\* $P < 0.01$ , \* $P < 0.05$ .

56

57

58

59

60

61

62

63

64

65

66

67

68

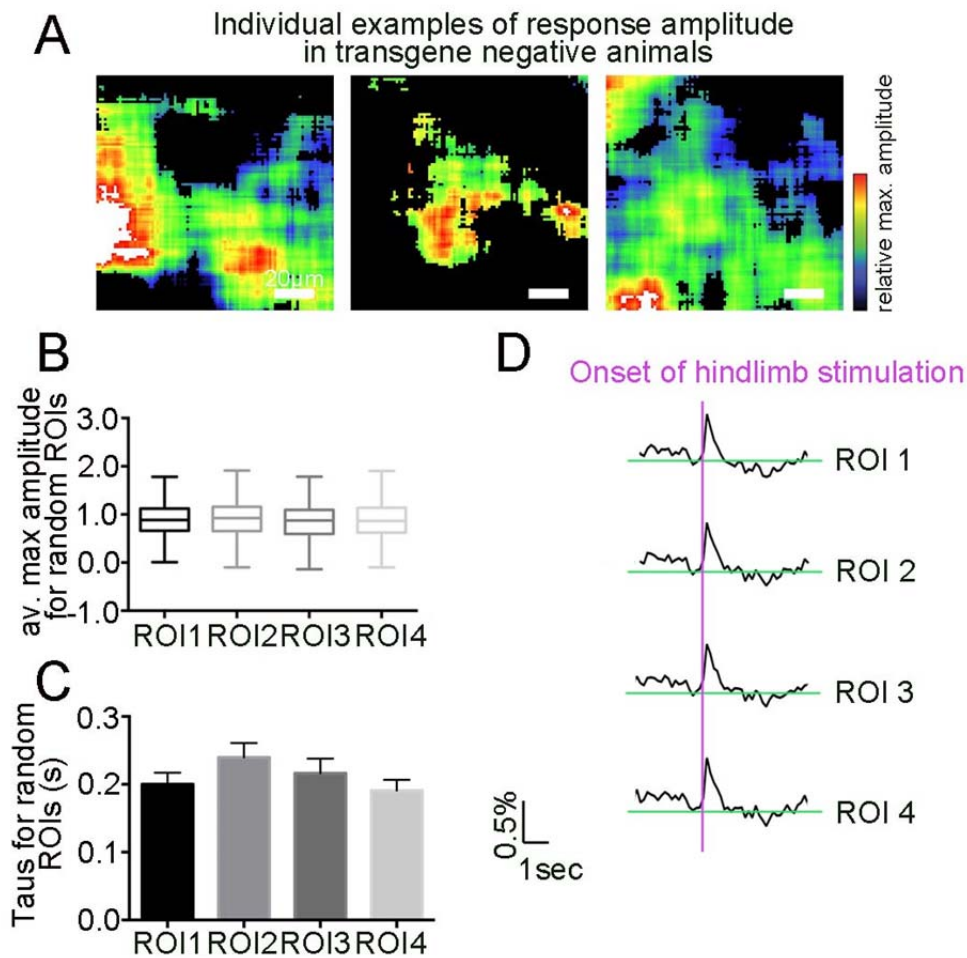

69  
70 **Supplementary Fig.4 Non-uniform response to hindlimb stimulation in transgene negative**  
71 **animals**

72  
73 A) Three individual examples of transgene negative animals responding to a hindlimb stimulus.  
74 The responding areas are shown in false colour displaying the relative maximum amplitudes at  
75 the timepoint of stimulation. B) The randomly placed ROIs show an average maximum  
76 amplitude that is not significantly different when comparing the ROIs. C) The taus obtained from  
77 the randomly placed ROIs show no significant difference when comparing the different traces, as  
78 can also be seen in the individually plotted average traces in D. Error bars indicate SEM.

79  
80  
81  
82  
83  
84  
85

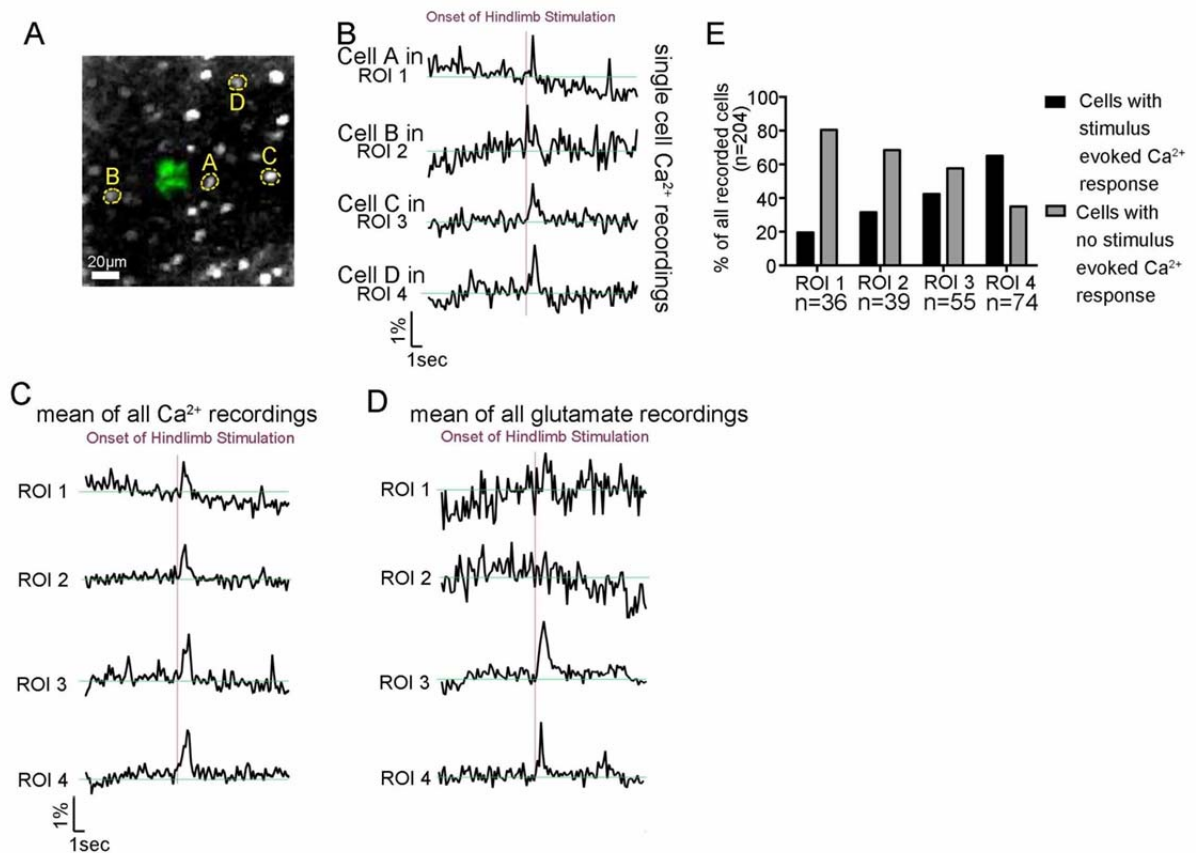

86  
87  
88  
89  
90  
91  
92  
93  
94  
95  
96  
97  
98  
99  
100  
101  
102  
103  
104  
105  
106  
107

### Supplementary Fig. 5 Ca<sup>2+</sup> imaging in relation to plaque distance

Intracortical injection of AAV.hSynapsin.iGluSnFR and AAV1.Syn.Flex.NES-jRGECO1a.WPRE.SV40 in somatosensory cortex area (APPPS1 mice n=3, 3-4 imaged brain areas/mouse). Glutamate and Calcium fluctuations were imaged using tpls. A) Merge of brain region with jRGECO expressing neurons (white) and methoxy\_X04 stained amyloid deposit (green). Scalebar 20µm. B) Traces of single calcium recordings (circled in yellow) in different regions of interest in relation to the amyloid deposit shown in green. C) Mean of recorded Ca<sup>2+</sup> traces from all responding cells in the different regions of interest. D) Mean of recorded Glutamate traces from the different regions of interest. No stimulus evoked response was detected in ROI1 and 2. E) Even though Ca<sup>2+</sup> recordings showed stimulus evoked responses in all ROIs, the overall percentage of responding cells was lower in the immediate plaque microenvironment.

108  
109

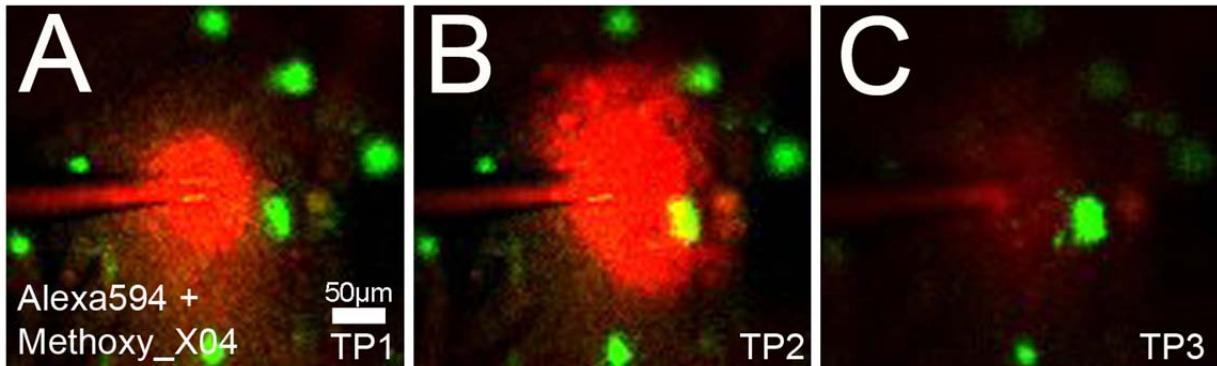

110  
111 **Supplementary Fig.6 Diffusion of Alexa594 around amyloid plaques**

112  
113 Alexa 594 was puffed into the brain adjacent to an amyloid plaque to test whether the rate of  
114 diffusion and or rate of decay is changed in ROI1 in comparison to ROI4. A) Alexa 594 is shown  
115 in red and amyloid plaques are stained with methoxy\_X04 in green. Time point 1 (TP1) shows  
116 the start of the diffusion. B) The Alexa 594 is reaching the amyloid plaque in TP2. C) The decay  
117 of the dye around the plaque is shown in TP3. The following taus were calculated for the decay  
118 rate of Alexa 594 in ROI1  $\tau=11.290\pm 0.2$  sec and ROI4  $\tau=11.30\pm 0.2$  sec. Thus, no  
119 difference in the rate of decay was detected in this experiment.

120  
121  
122  
123  
124  
125  
126  
127  
128  
129  
130  
131  
132  
133  
134  
135  
136  
137  
138  
139



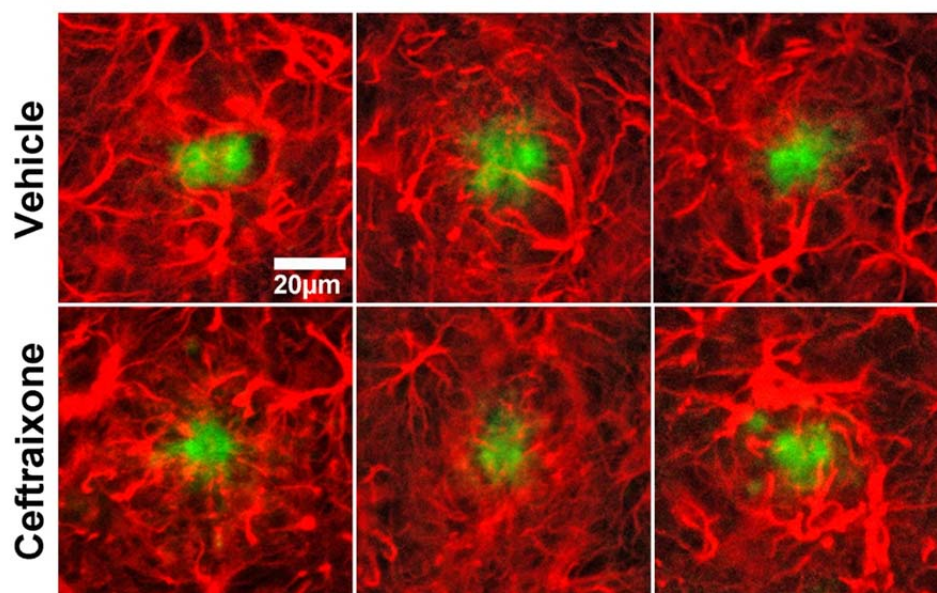

140  
141 **Supplementary Fig.7 GFAP staining around amyloid deposits after Ceftriaxone and vehicle**  
142 **treatment**

143  
144 Immunohistological stainings of astrocytes using GFAP in red and amyloid deposits in green are  
145 shown in 3 different examples after treatment with either Ceftriaxone or vehicle.  
146 We observed a similar expression pattern when comparing GFAP after Ceftriaxone and vehicle  
147 treatment.
